# Supplementary material
Source: MDPI journal article supplement (https://www.mdpi.com/2079-6412/14/5/625)
Supplement: s1 [file s1]

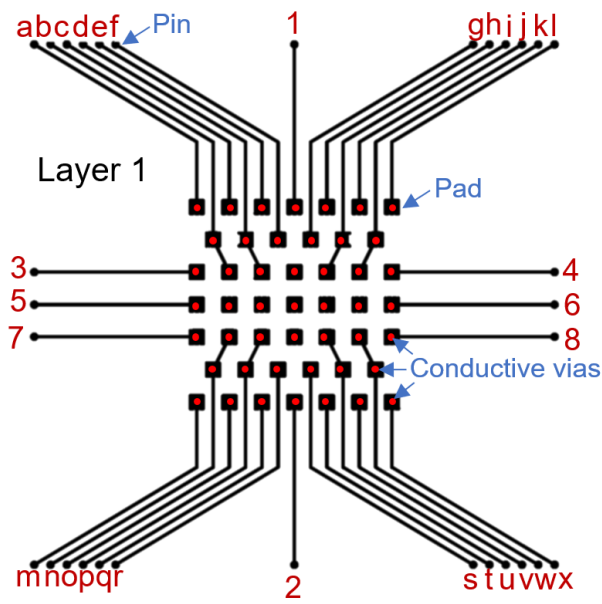

Figure S1. Circuit diagram of the first layer.

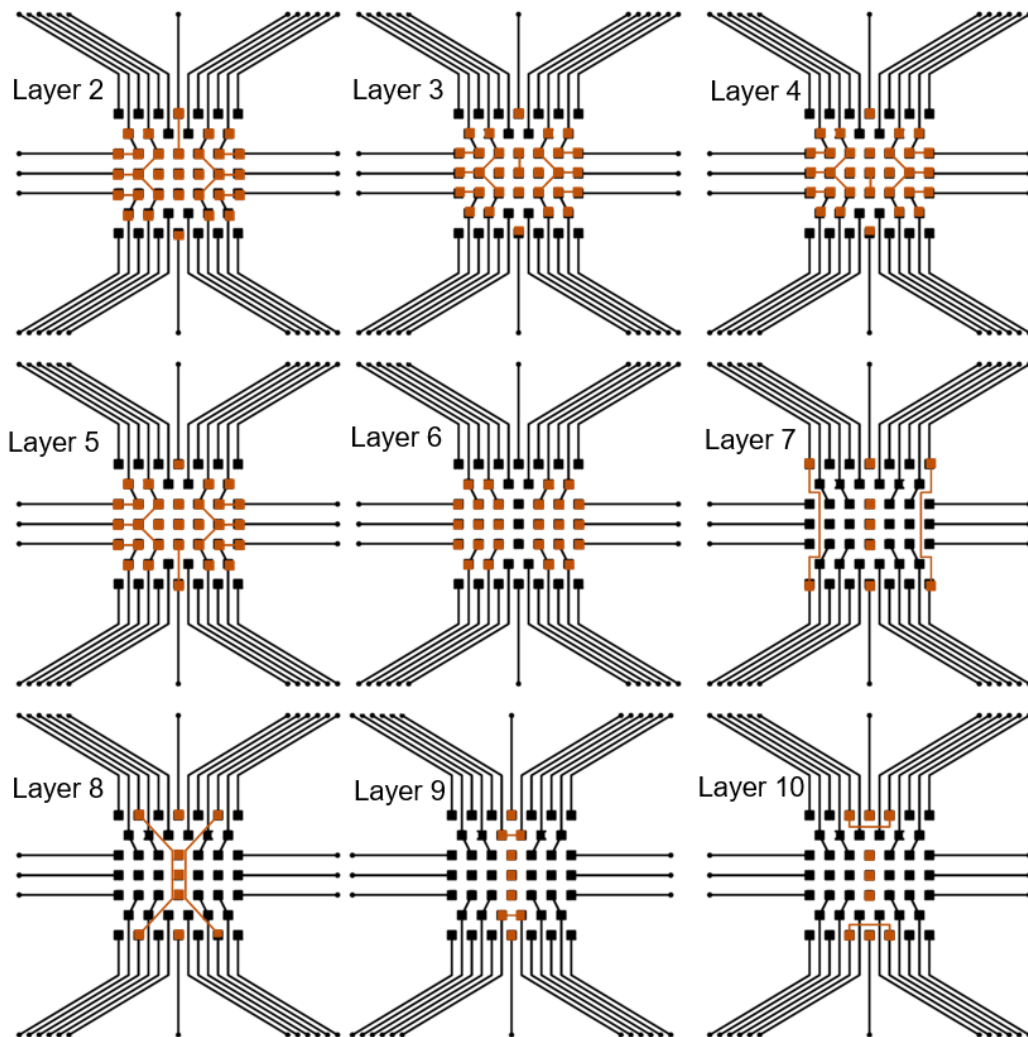

Figure S2. Circuit diagram from the second to tenth layers.

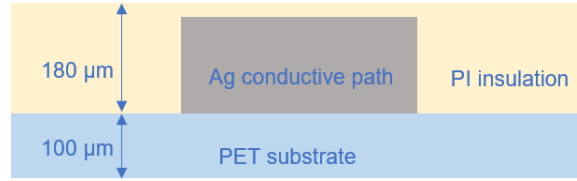

**Figure S3.** Cross-section schematic diagram of the FEA model

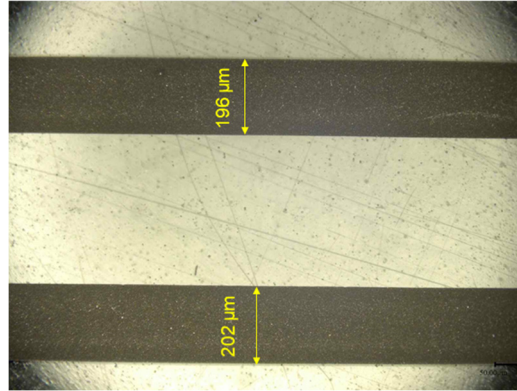

**Figure S4.** The conductive path printed by EHD.
